# Supplementary material for: Inter-Laboratory Reproducibility of Inducible HIV-1 Reservoir Quantification by TILDA
Source: PubMed Central journal article supplement (PMC7552071; doi:10.3390/v12090973), 2020-09-02
Supplement: viruses-12-00973-s001.pdf [file viruses-12-00973-s001.pdf]

**Table S1. Characteristics of study participants**

| ID                         | Age<br>(years) | CD4 nadir<br>(cells/mm <sup>3</sup> ) | HIV-1<br>subtype | Pre-cART<br>plasma HIV-1<br>RNA (log10<br>copies/mL) | Time on<br>cART<br>(years) | CD4+ T cell<br>count<br>(cells/mm <sup>3</sup> ) | TILDA v2.0<br>(Upper and lower 95% CI) |
|----------------------------|----------------|---------------------------------------|------------------|------------------------------------------------------|----------------------------|--------------------------------------------------|----------------------------------------|
| ART02                      | 51             | 400                                   | B                | >5.0                                                 | 6.9                        | 790                                              | 2.8 (0.7, 11)                          |
| ART03                      | 50             | 600                                   | B                | 4.75                                                 | 5.6                        | 1100                                             | 27.3 (16.9, 44.1)                      |
| ART04                      | 26             | 750                                   | B                | 5.64                                                 | 4.0                        | 1020                                             | 13.1 (6.8, 25.2)                       |
| ART05                      | 29             | 390                                   | B                | 4.78                                                 | 1.6                        | 540                                              | 14.8 (7.9, 27.5)                       |
| ART06                      | 64             | 30                                    | B                | 5.50                                                 | 2.2                        | 390                                              | 362 (253.7, 516.2)                     |
| ART08                      | 57             | 420                                   | B                | 7.21                                                 | 2.1                        | 1120                                             | 5.5 (2.1, 14.8)                        |
| ART09                      | 29             | 520                                   | B                | 5.23                                                 | 1.8                        | 520                                              | 43.7 (26.9, 71)                        |
| ART10                      | 52             | 420                                   | B                | 4.74                                                 | 1.3                        | 790                                              | 25.5 (15, 43.2)                        |
| ART11                      | 33             | 980                                   | B                | 5.27                                                 | 1.5                        | 790                                              | 2.7 (0.7, 10.9)                        |
| ART13                      | 41             | 220                                   | B                | >5.0                                                 | 7.2                        | 710                                              | 90 (65.1, 124.3)                       |
| ART14                      | 23             | 470                                   | B                | 4.75                                                 | 1.4                        | 1360                                             | 2.7 (0.7, 10.9)                        |
| ART15                      | 50             | 270                                   | B                | 3.95                                                 | 5.5                        | 580                                              | 1.4 (0.2, 9.6)                         |
| ART16                      | 29             | 390                                   | B                | 4.17                                                 | 2.0                        | 700                                              | TND                                    |
| ART17                      | 24             | 430                                   | B                | 4.85                                                 | 1.3                        | 670                                              | 7.0 (2.9, 16.9)                        |
| ART19                      | 41             | 660                                   | B                | 4.86                                                 | 0.8                        | 660                                              | 7.0 (2.9, 16.9)                        |
| ART20                      | 40             | 230                                   | B                | 5.17                                                 | 6.4                        | 730                                              | 2.8 (0.7, 11.1)                        |
| ART21                      | 57             | 350                                   | B                | 5.14                                                 | 1.4                        | 840                                              | 41.2 (27.2, 62.4)                      |
| ART22                      | 25             | 1060                                  | B                | 4.20                                                 | 2.6                        | 1590                                             | 22.4 (12, 41.7)                        |
| ART23                      | 44             | 530                                   | B                | 5.65                                                 | 4.3                        | 960                                              | 70 (49.4, 99.4)                        |
| ART24                      | 45             | 220                                   | B                | 4.81                                                 | 8.5                        | 490                                              | 22.7 (12.6, 41.1)                      |
| ART25                      | 37             | 340                                   | B                | 4.29                                                 | 2.7                        | 810                                              | 1.4 (0.2, 9.6)                         |
| ART26                      | 36             | 440                                   | B                | 4.57                                                 | 9.9                        | 960                                              | 1.4 (0.2, 9.6)                         |
| ART27                      | 41             | 370                                   | B                | 5.31                                                 | 6.2                        | 570                                              | 29.2 (18.4, 46.5)                      |
| ART28                      | 56             | 400                                   | B                | 4.73                                                 | 10.5                       | 590                                              | 31.3 (19.9, 49.2)                      |
| ART29                      | 42             | 650                                   | B                | 4.87                                                 | 10.6                       | 730                                              | 61.5 (41.6, 91)                        |
| ART30                      | 48             | 450                                   | B                | 5.01                                                 | 9.7                        | 940                                              | 55.3 (38.3, 79.7)                      |
| ART31                      | 42             | 340                                   | B                | 5.03                                                 | 8.8                        | 510                                              | 29.4 (18.7, 46.3)                      |
| ART32                      | 45             | 310                                   | B                | 5.01                                                 | 7.4                        | 580                                              | 36.8 (24.1, 56.1)                      |
| ART33                      | 37             | 300                                   | B                | 4.85                                                 | 10.5                       | 680                                              | 45.3 (25.5, 79.5)                      |
| ART34                      | 42             | 290                                   | B                | 4.01                                                 | 2.9                        | 580                                              | 17 (9.4, 30.7)                         |
| ART35                      | 56             | 350                                   | B                | NA                                                   | 11.7                       | 700                                              | 25.2 (15.4, 41.3)                      |
| ART36                      | 50             | 350                                   | B                | 5.15                                                 | 3.5                        | 650                                              | 165.7 (121.7, 225.2)                   |
| <i>Non-B HIV-1 subtype</i> |                |                                       |                  |                                                      |                            |                                                  |                                        |
| ART01                      | 68             | 310                                   | ND               | 5.50                                                 | 13.1                       | 770                                              | TD                                     |
| ART07                      | 54             | 250                                   | AG               | 4.92                                                 | 1.4                        | 370                                              | TND                                    |
| ART12                      | 36             | NA                                    | ND               | NA                                                   | 3.0                        | 410                                              | TND                                    |
| ART18                      | 46             | 141                                   | G                | 6.36                                                 | 2.2                        | 410                                              | TD                                     |

TD: target detected, TND: target not detected, 95% CI: 95% Confidence interval, NA: not available, ND: not determined
